# Supplementary material for: ONCOS-102 plus pemetrexed and platinum chemotherapy in malignant pleural mesothelioma: a randomized phase 2 study investigating clinical outcomes and the tumor microenvironment
Source: PubMed Central journal article supplement — J Immunother Cancer. 2023 Sep 3;11(9):e007552. doi: 10.1136/jitc-2023-007552 (PMC10476122; doi:10.1136/jitc-2023-007552), 2023-09-03
Supplement: jitc-2023-007552supp001.pdf [file jitc-2023-007552supp001.pdf]

1 **Supplementary figure 1. Swimmer plot of overall survival and progression-free survival**

2 (A) ITT population (n = 31); (B) chemotherapy-naïve patients (n = 17)

3 Control = pemetrexed (500 mg/m<sup>2</sup>) in combination with cisplatin (75 mg/m<sup>2</sup>) or carboplatin (AUC 5)

4 ONCOS-102 = ONCOS-102 (3 × 10<sup>11</sup> virus particles in 2.5 mL) with pemetrexed (500 mg/m<sup>2</sup>) in

5 combination with cisplatin (75 mg/m<sup>2</sup>) or carboplatin (AUC 5)

6 > denotes censoring

7 PFS, progression-free survival; OS, overall survival

8

9 **Supplementary figure 2. Selected gene expression profiles stratified by study treatment**

10 Normalized (using DESeq2) expression of genes classified as cytotoxicity (A), co-stimulatory (B), or  
11 checkpoint inhibitor (C) genes in tumour biopsies obtained at baseline and Day 36 stratified by study  
12 treatment. Values in parenthesis reflect the number of samples for each group at each timepoint.

13 Control = pemetrexed (500 mg/m<sup>2</sup>) in combination with cisplatin (75 mg/m<sup>2</sup>) or carboplatin (AUC 5)

14 ONCOS-102 = ONCOS-102 (3 × 10<sup>11</sup> virus particles in 2.5 mL) with pemetrexed (500 mg/m<sup>2</sup>) in

15 combination with cisplatin (75 mg/m<sup>2</sup>) or carboplatin (AUC 5)

16

17 **Supplementary figure 3. Serum cytokine concentrations**

18 Circulating concentrations of GM-CSF (A), IFNα2 (B) and IFN-gamma (C) were assessed prior to study  
19 medication on Days 1, 43, 85, and 127 in the chemotherapy-alone cohort (upper panels), and on  
20 Days 1 Days 4, 8, 36, 78, and 120 in the ONCOS-102 cohort. P-values were calculated by linear  
21 regression.

22 Control = pemetrexed (500 mg/m<sup>2</sup>) in combination with cisplatin (75 mg/m<sup>2</sup>) or carboplatin (AUC 5)

23 ONCOS-102 = ONCOS-102 ( $3 \times 10^{11}$  virus particles in 2.5 mL) with pemetrexed ( $500 \text{ mg/m}^2$ ) in  
24 combination with cisplatin ( $75 \text{ mg/m}^2$ ) or carboplatin (AUC 5)

25 \*\* $P < 0.01$ ; \*\*\* $P < 0.001$

26 D, study day, GM-CSF, granulocyte-macrophage colony stimulating factor; IFN, interferon; IL2,  
27 interleukin 2

28

29 **Supplementary figure 4. Selected gene expression profiles stratified by survival at Month 18**

30 **(ONCOS-102 group<sup>a</sup>)**

31 Normalized (using DESeq2) expression of selected cytotoxicity genes (A), co-stimulatory genes (B), or  
32 checkpoint inhibitor genes (C) in tumour biopsies obtained at baseline and Day 36 stratified by 18-  
33 month survival. Numbers in parenthesis reflect the number of samples for each group at each  
34 timepoint.

35 <sup>a</sup>ONCOS-102 ( $3 \times 10^{11}$  virus particles in 2.5 mL) with pemetrexed ( $500 \text{ mg/m}^2$ ) in combination with  
36 cisplatin ( $75 \text{ mg/m}^2$ ) or carboplatin (AUC 5).

37

38 **Supplementary figure 5. Tumour transcriptome analysis stratified by survival at Month 18**

39 **(ONCOS-102 group<sup>a</sup>)**

40 Heatmaps of the top 100 most differentially expressed genes in patients stratified by survival (alive  
41 or deceased at Month 18) in baseline (A) and Day 36 (D) tumour biopsies from patients who  
42 received ONCOS-102. Volcano plot depicting change in all tumour-expressed genes at baseline (B)  
43 and Day 36 (E) in patients (alive or deceased at Month 18) (Benjamini-Hochberg adjusted  $P$ -values).  
44 Gene ontology analysis of tumour genes with significant differential expression at baseline (C) and  
45 Day 36 (F) in patients who were alive versus deceased at Month 18.

46 <sup>a</sup>ONCOS-102 ( $3 \times 10^{11}$  virus particles in 2.5 mL) with pemetrexed (500 mg/m<sup>2</sup>) in combination with  
47 cisplatin (75 mg/m<sup>2</sup>) or carboplatin (AUC 5).

48

49 **Supplementary figure 6. Predictors of survival at Month 18 following (ONCOS-102 cohort<sup>a</sup>)**

50 (A) Baseline tumour transcriptome levels of *PD-L1*, *CD8A*, *LAG3*, and *STAT1* stratified by survival at  
51 Month 18. (B) 2x2 contingency table comparing the binomial GLM classifier build on transcriptome  
52 data shown in (A) with ground-truth survival. (C) ROC-analysis of model prediction. (D) GLM  
53 coefficients reflecting the predictive value for each gene on survival.

54 <sup>a</sup>ONCOS-102 ( $3 \times 10^{11}$  virus particles in 2.5 mL) with pemetrexed (500 mg/m<sup>2</sup>) in combination with  
55 cisplatin (75 mg/m<sup>2</sup>) or carboplatin (AUC 5).

56 BL, baseline; D, day; GLM, generalized linear model; ROC, receiver operating characteristics

57

58
