# Supplementary material for: ONCOS-102 plus pemetrexed and platinum chemotherapy in malignant pleural mesothelioma: a randomized phase 2 study investigating clinical outcomes and the tumor microenvironment
Source: PubMed Central journal article supplement — J Immunother Cancer. 2023 Sep 3;11(9):e007552. doi: 10.1136/jitc-2023-007552 (PMC10476122; doi:10.1136/jitc-2023-007552), 2023-09-03

# Supplementary Figure 5. Tumour transcriptome analysis stratified by survival at Month 18 (ONCOS-102 group<sup>a</sup>)

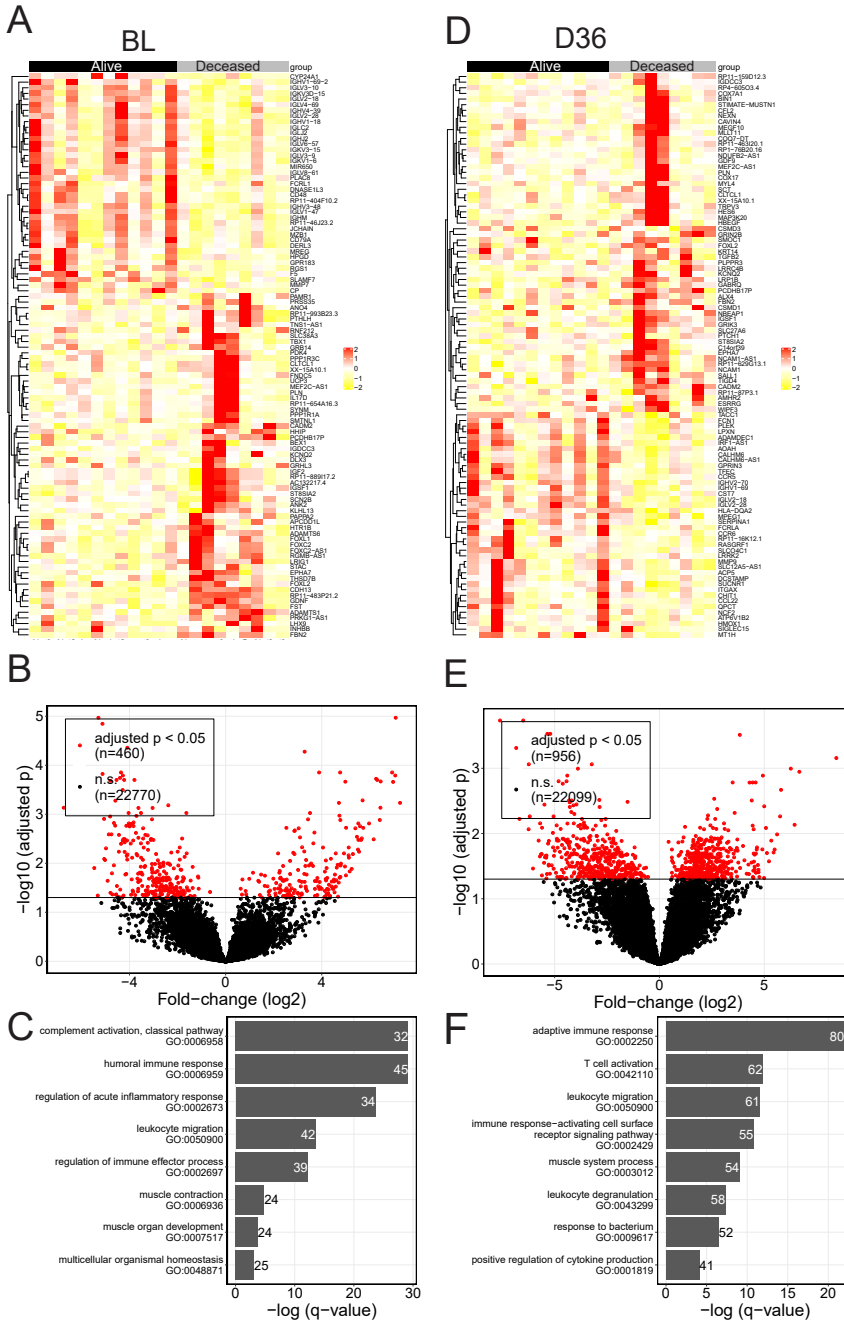

Supplement: jitc-2023-007552supp006.pdf [file jitc-2023-007552supp006.pdf]
