# Supplementary figures and images for: ONCOS-102 plus pemetrexed and platinum chemotherapy in malignant pleural mesothelioma: a randomized phase 2 study investigating clinical outcomes and the tumor microenvironment
Source: PubMed Central journal article supplement — J Immunother Cancer. 2023 Sep 3;11(9):e007552. doi: 10.1136/jitc-2023-007552 (PMC10476122; doi:10.1136/jitc-2023-007552), 2023-09-03

# Supplementary Figure 1. Swimmer plot of overall survival and progression-free survival

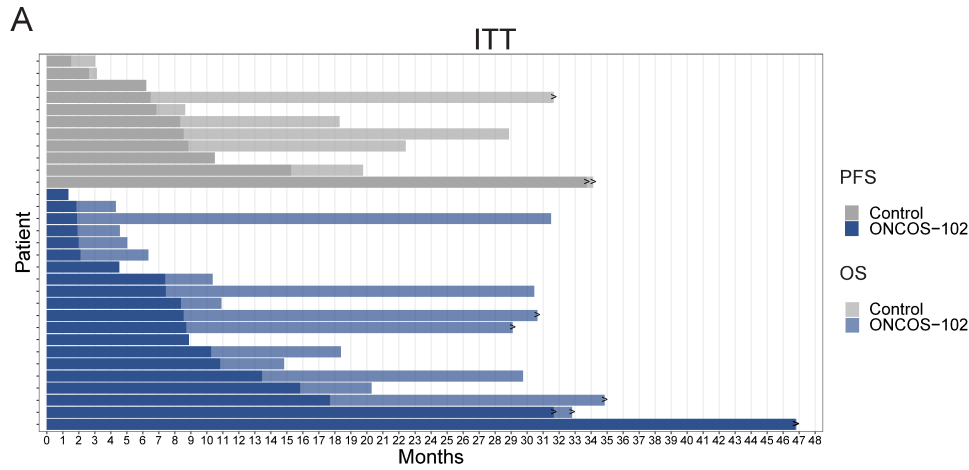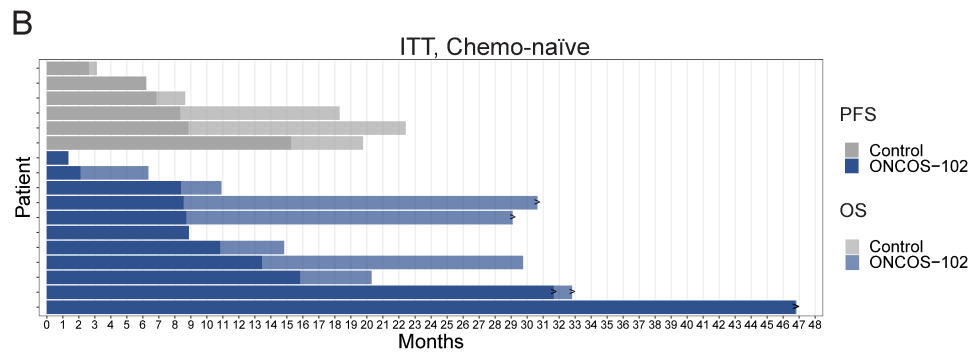

Supplement: jitc-2023-007552supp002.pdf [file jitc-2023-007552supp002.pdf]

## Supplementary Figure 2. Selected gene expression profiles stratified by study treatment

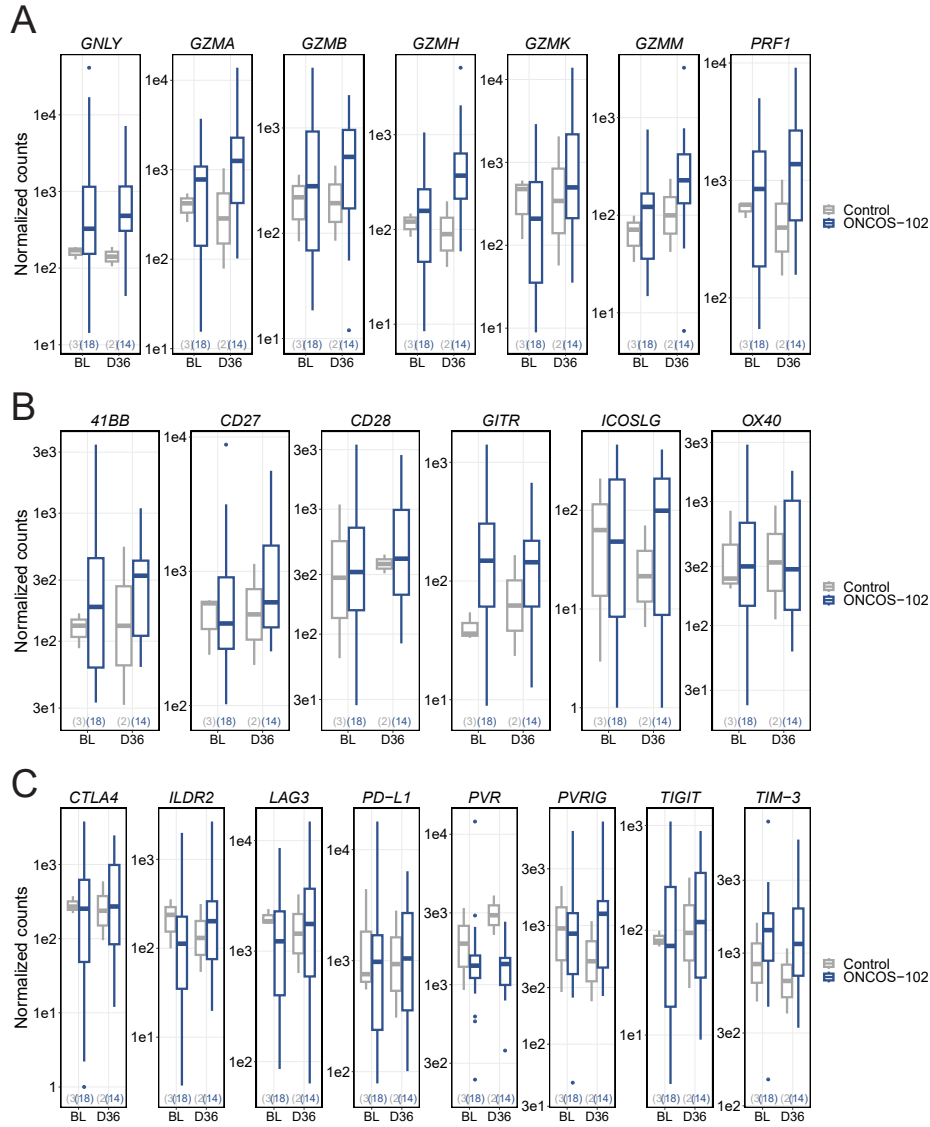

Supplement: jitc-2023-007552supp003.pdf [file jitc-2023-007552supp003.pdf]

## Supplementary Figure 3. Serum cytokine concentrations

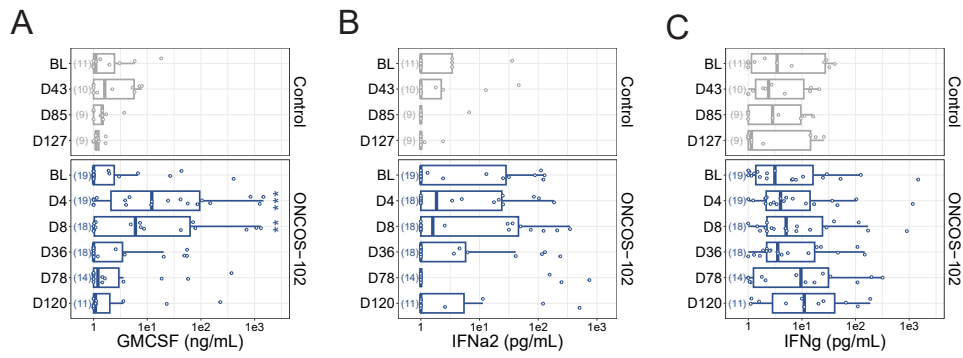

Supplement: jitc-2023-007552supp004.pdf [file jitc-2023-007552supp004.pdf]

Supplementary Figure 6. Predictors of survival at Month 18 following (ONCOS-102 cohort<sup>a</sup>)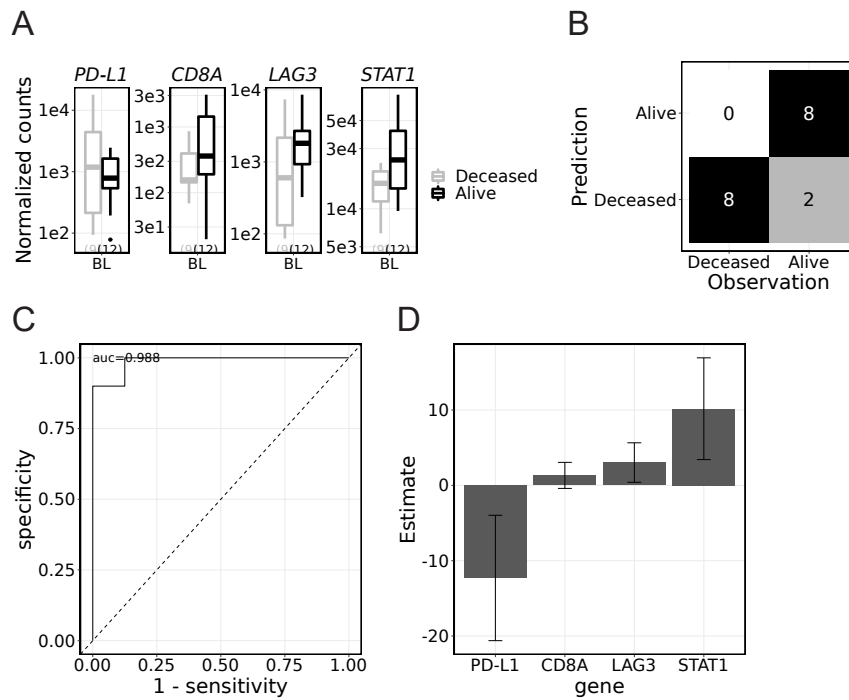

Supplement: jitc-2023-007552supp007.pdf [file jitc-2023-007552supp007.pdf]
